# Supplementary material for: Synergistic Effect of Simultaneous versus Sequential Combined Treatment of Histone Deacetylase Inhibitor Valproic Acid with Etoposide on Melanoma Cells
Source: Int J Mol Sci. 2021 Sep 17;22(18):10029. doi: 10.3390/ijms221810029 (PMC8467070; doi:10.3390/ijms221810029)
Supplement: Supplementary file 1 [file ijms-22-10029-s001.zip › ijms-1331008-supplementary.pdf]

## Supplementary Information

| Range of CI | Graded symbol | Drug effect            |
|-------------|---------------|------------------------|
| <0.1        | + + + + +     | Very strong synergism  |
| 0.1-0.3     | + + + +       | Strong synergism       |
| 0.3-0.7     | + + +         | Synergism              |
| 0.7-0.85    | + +           | Moderate synergism     |
| 0.85-0.90   | +             | Slight synergism       |
| 0.90-1.10   | ±             | Nearly additive        |
| 1.10-1.20   | –             | Slight antagonism      |
| 1.20-1.45   | – –           | Moderate antagonism    |
| 1.45-3.3    | – – –         | Antagonism             |
| 3.3-10      | – – – –       | Strong antagonism      |
| >10         | – – – – –     | Very strong antagonism |

### Supplementary Table S1. Categorization of combination index (CI) of drug combination to corresponding drug effect and grading

This table is adapted from the paper published by Chou [17].

| Cell line                                                               | B16-F10                |                     |                        |
|-------------------------------------------------------------------------|------------------------|---------------------|------------------------|
| Drug sequential order of combination treatment                          | CI values and gradings |                     |                        |
|                                                                         | ED <sub>50</sub>       | ED <sub>75</sub>    | ED <sub>90</sub>       |
| <b>Combination</b><br>(Simultaneous combined treatment of VPA and ETO)  | 0.57<br><br>+ + +      | 0.73<br><br>+ +     | 1.42<br><br>- -        |
| <b>V→E</b><br>(Sequential combined treatment that pre-treated with VPA) | 1.77<br><br>- - -      | 3.52<br><br>- - - - | 10.58<br><br>- - - - - |
| <b>E→V</b><br>(Sequential combined treatment that pre-treated with ETO) | 0.21<br><br>+ + + +    | 1.15<br><br>-       | 9.55<br><br>- - - -    |

| Cell line                                                               | SK-MEL-2-Luc           |                        |                         |
|-------------------------------------------------------------------------|------------------------|------------------------|-------------------------|
| Drug sequential order of combination treatment                          | CI values and gradings |                        |                         |
|                                                                         | ED <sub>50</sub>       | ED <sub>75</sub>       | ED <sub>90</sub>        |
| <b>Combination</b><br>(Simultaneous combined treatment of VPA and ETO)  | 0.30<br><br>+ + +      | 0.39<br><br>+ + +      | 0.68<br><br>+ + +       |
| <b>V→E</b><br>(Sequential combined treatment that pre-treated with VPA) | 1.17<br><br>—          | 11.38<br><br>— — — — — | 147.31<br><br>— — — — — |
| <b>E→V</b><br>(Sequential combined treatment that pre-treated with ETO) | 0.32<br><br>+ + +      | 0.43<br><br>+ + +      | 0.77<br><br>+ +         |

**Supplementary Table S2. Combination index (CI) values and synergism/antagonism grading of simultaneous and sequential combined treatments of VPA and ETO on B16-F10 and SK-MEL-2-Luc cells**
